# Supplementary material for: Anisometric C60fullerene colloids assisted by structure-directing agent
Source: Royal Society of Chemistry journal article supplement (doi:10.1039/c5ce02122g), 2016-01-01
Supplement: c5ce02122g1.pdf [file c5ce02122g1.pdf]

Supporting Information

**Anisometric C<sub>60</sub> Fullerene Colloids Assisted by Structure-Directing Agent**

*Sonny J. Penterman, Chekesha M. Liddell Watson\**

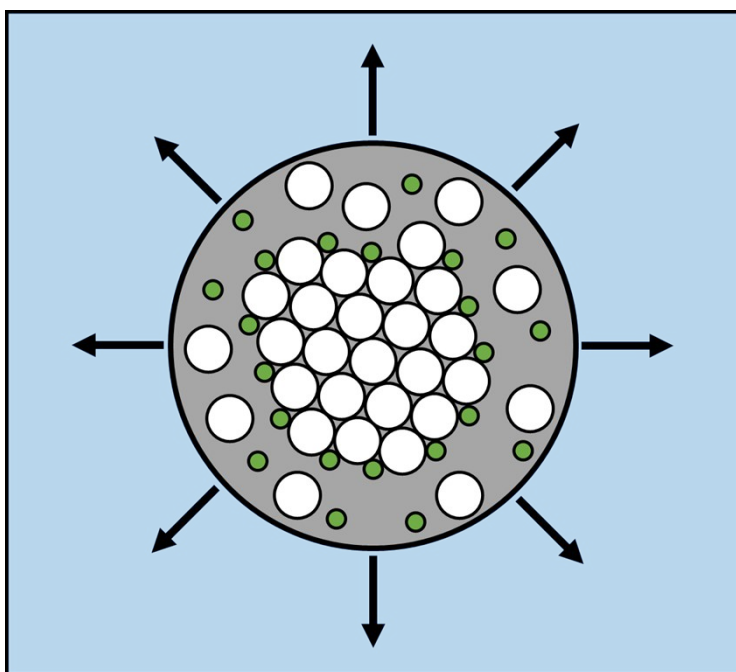

**Fig. S1** Schematic growth of fullerene crystals in solvent mixtures in the presence of a structure-directing agent. Solutions of C<sub>60</sub> (white) in good solvent mixtures (grey) are dispersed in antisolvent (blue). Droplet shrinkage due to solvent interdiffusion induces nucleation. The structure-directing agent (green) shortens the nucleation period and associates with the interface, slowing growth.

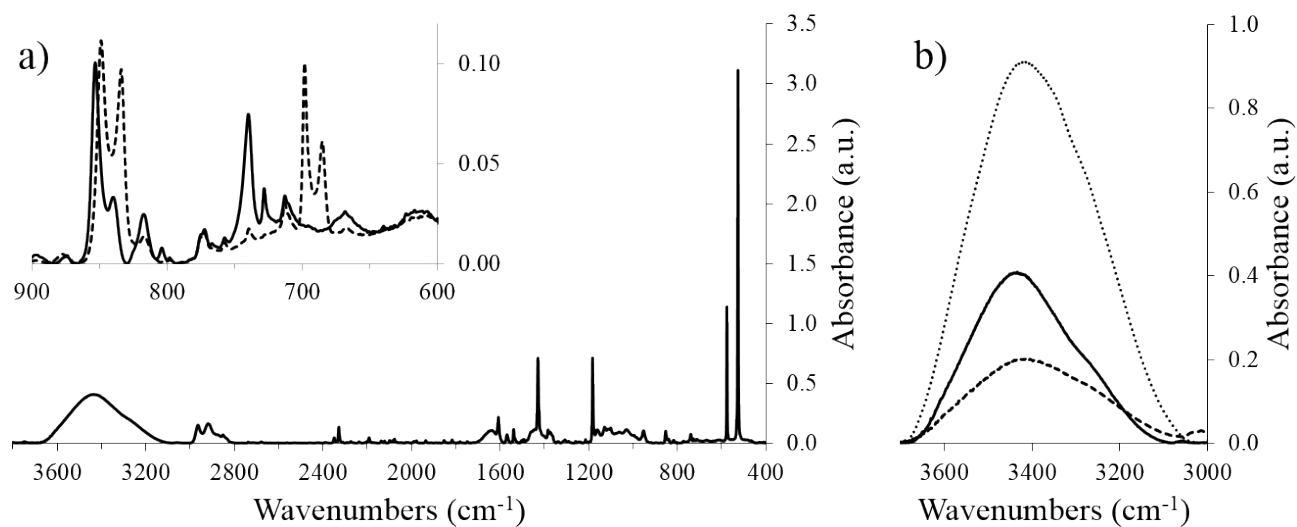

**Fig. S2** IR absorption spectra of solvated microcrystals. (a)  $\text{C}_{60}$ /tetralin/TMP, inset the same composition (black) compared with  $\text{C}_{60}$ /mesitylene/TMP (dashed). The inset highlights characteristic features of the incorporated aromatic solvents. (b) O–H stretch bands for  $\text{C}_{60}$ /tetralin/TMP (solid),  $\text{C}_{60}$ /mesitylene/TMP (dashed) and  $\text{C}_{60}$ /mesitylene (dotted).

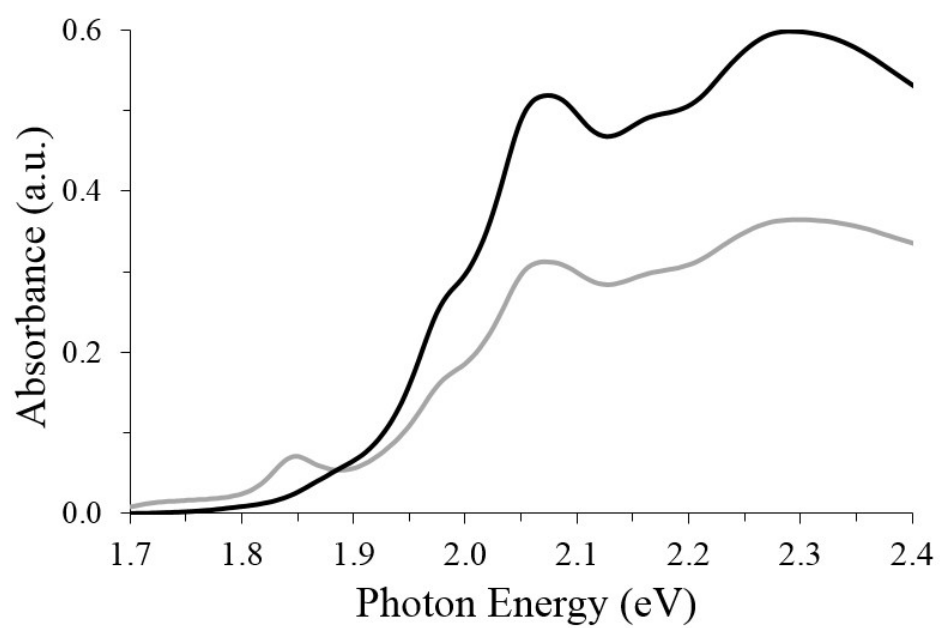

**Fig. S3** Optical absorption spectra of solutions before addition of alcohol. C<sub>60</sub> in pure mesitylene (black), and C<sub>60</sub> in mesitylene with 20% v/v TMP (grey). Spectra were measured within 20 minutes of TMP addition.

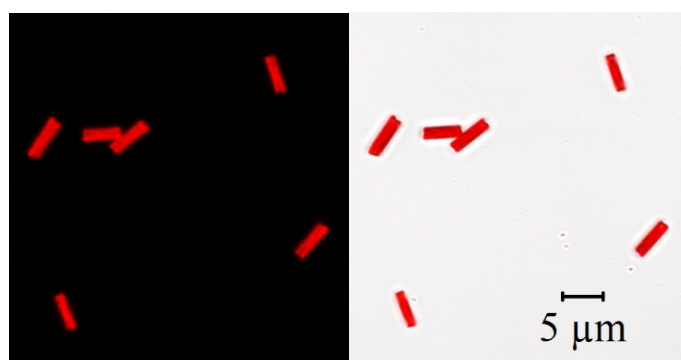

**Fig. S4** Confocal microscope image of the  $C_{60}$ /mesitylene/TMP solvates shown in Figure 1b.  $\lambda_{\text{ex}} = 488 \text{ nm}$
